# Supplementary material for: Unveiling the role of electrode architecture and illumination direction in heterojunction photo-supercapacitors performance and charge storage mechanism
Source: Royal Society of Chemistry journal article supplement (doi:10.1039/d5ta08746e), 2026-01-01
Supplement: d5ta08746e1.pdf [file d5ta08746e1.pdf]

## Supporting Information

### **Unveiling the Role of Electrode Architecture and Illumination Direction in Heterojunction Photo-Supercapacitors Performance and Charge Storage Mechanism**

*Zohreh Hosseini <sup>a</sup>, Mohamad Mohsen Momeni <sup>a\*</sup>, A. Wouter Maijenburg <sup>c,d</sup>,  
Fuxiang Zhang <sup>c</sup>*

*<sup>a</sup> Department of Chemistry, Isfahan University of Technology, Isfahan 84156-83111, Iran, [\\*mm.momeni@cc.iut.ac.ir](mailto:mm.momeni@cc.iut.ac.ir)*

*<sup>b</sup> Inorganic Chemistry, Institute of Chemistry, Martin-Luther-University Halle-Wittenberg, Kurt-Mothes-Straße 2, 06120 Halle (Saale), Germany*

*<sup>c</sup> Center for Innovation Competence SiLi-Nano, Martin-Luther-University Halle-Wittenberg, Karl-Freiherr-von-Fritsch-Straße 3, 06120 Halle (Saale), Germany*

*<sup>d</sup> State Key Laboratory of Catalysis, Dalian Institute of Chemical Physics, Chinese Academy of Sciences, Dalian National Laboratory for Clean Energy. 116023 Dalian, P R China*

## 1. Characterization

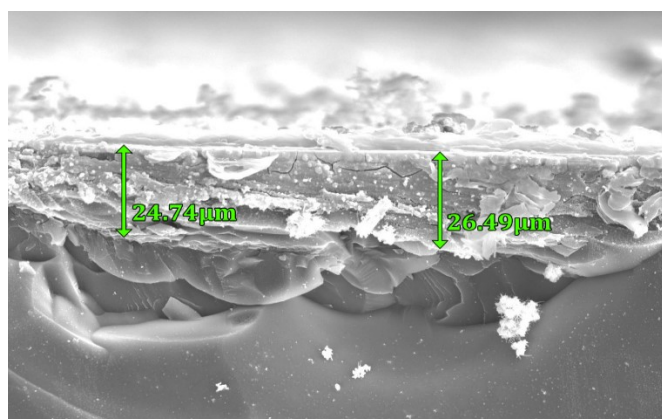

**Fig. S1** Cross-section image of the BVO electrode shows the thickness of this film on FTO.

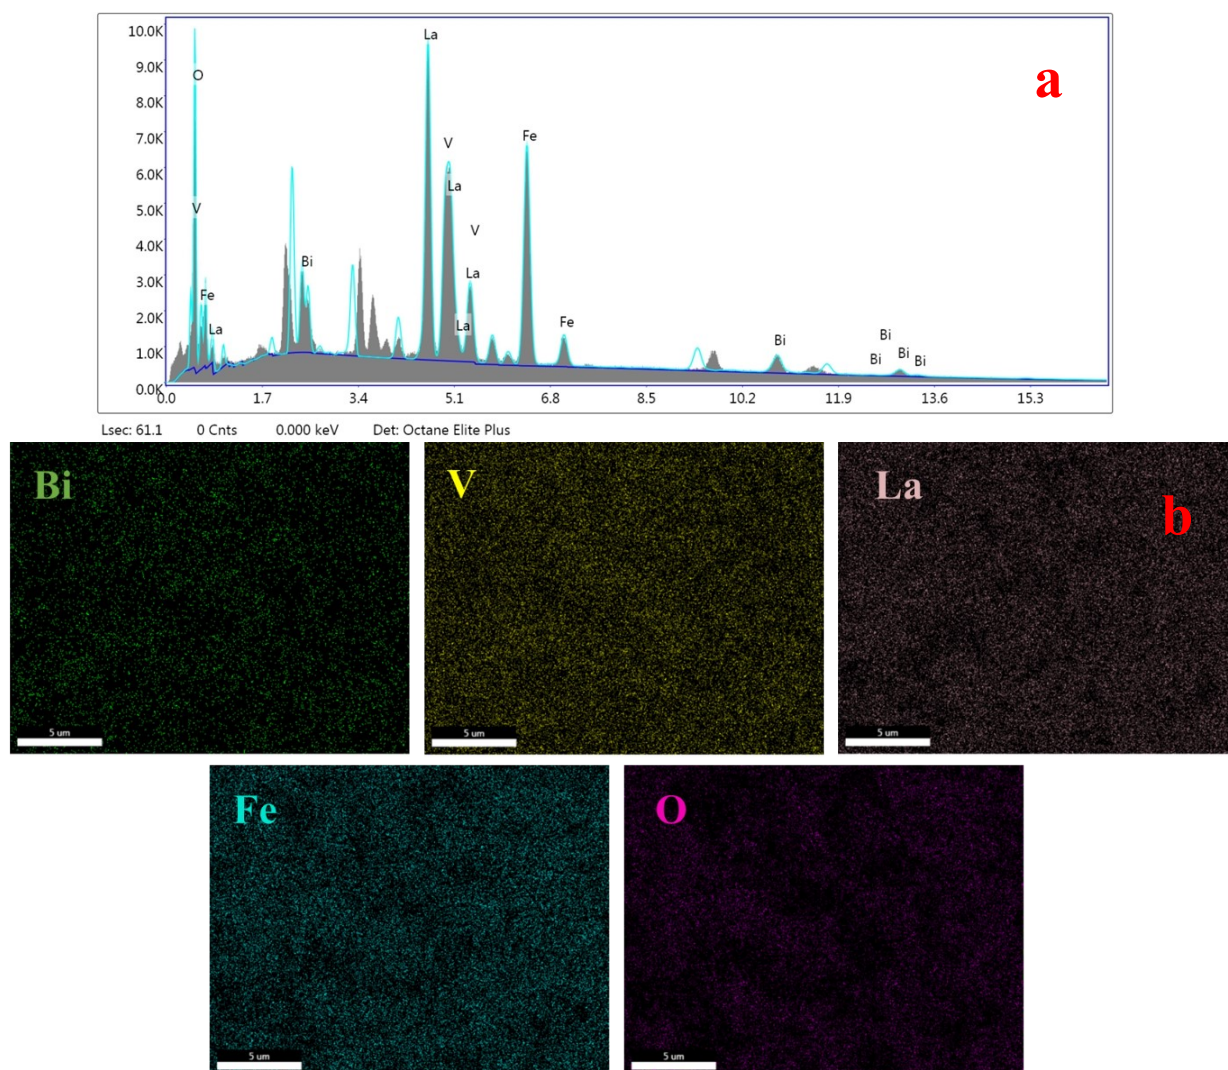

**Fig. S2** (a) EDS spectrum and (b) EDS-mapping of sample 12-LFO@BVO.

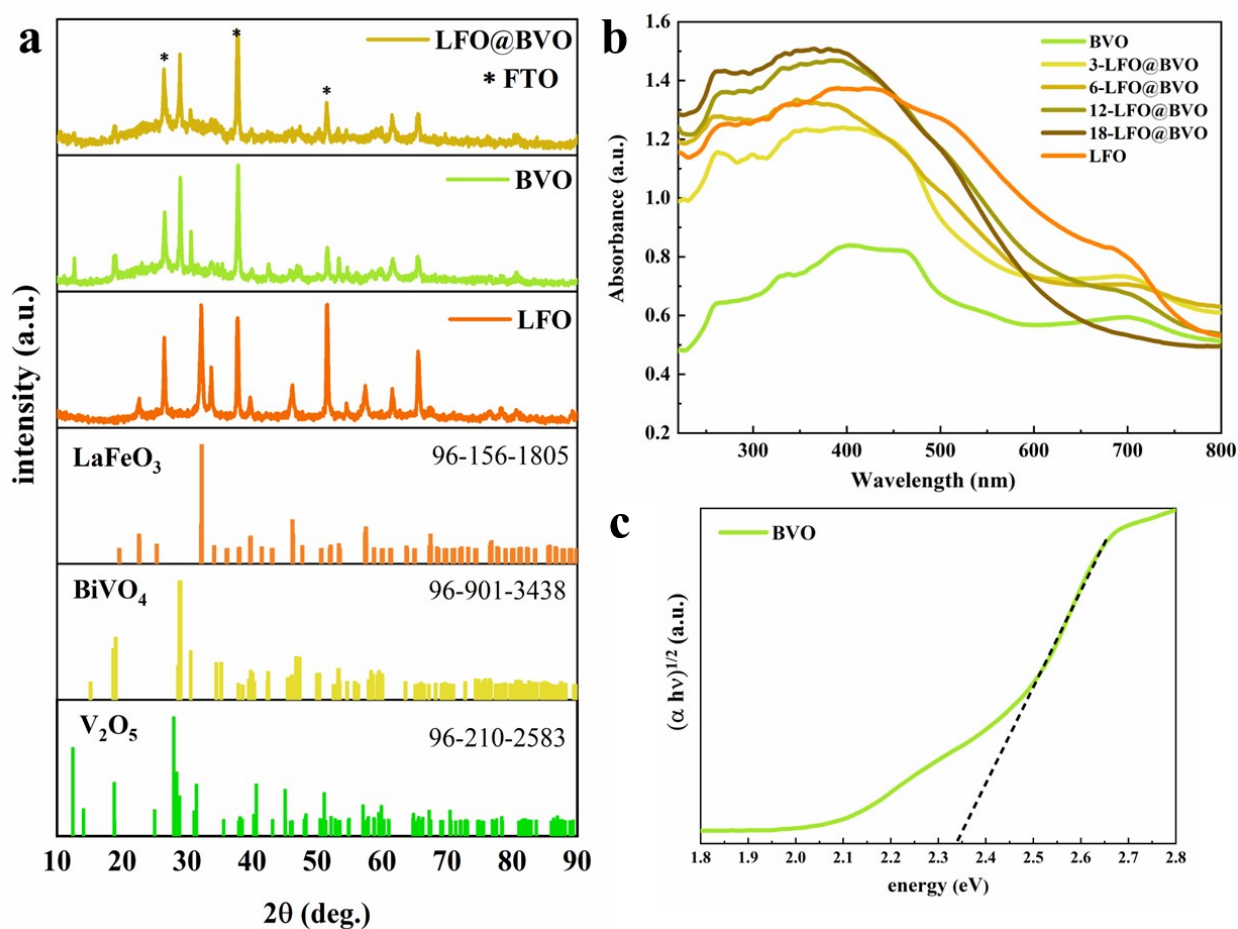

Fig. S3 XRD patterns of LFO, BVO and 12-LFO@FTO (a), DRS spectrum of all samples (b), Tauc plot of BVO (c).

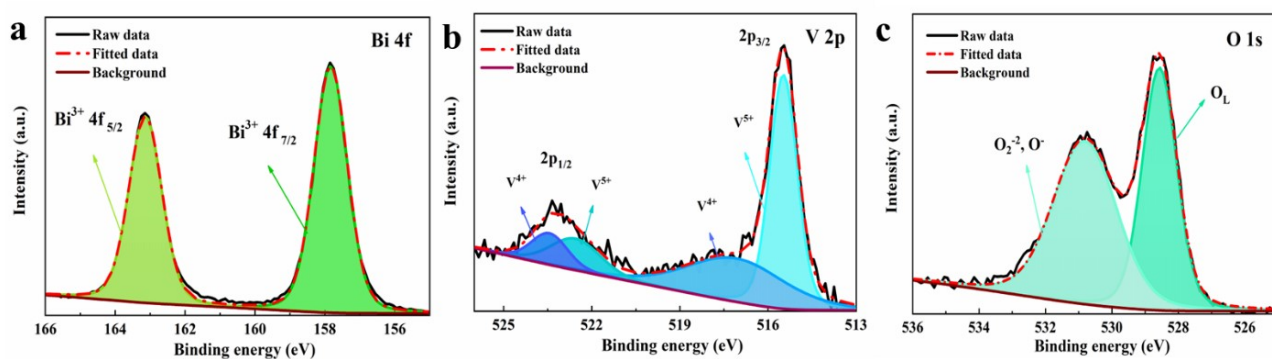

Fig. S4 HR-XPS data of BVO electrode

## 2. Three-electrode setup

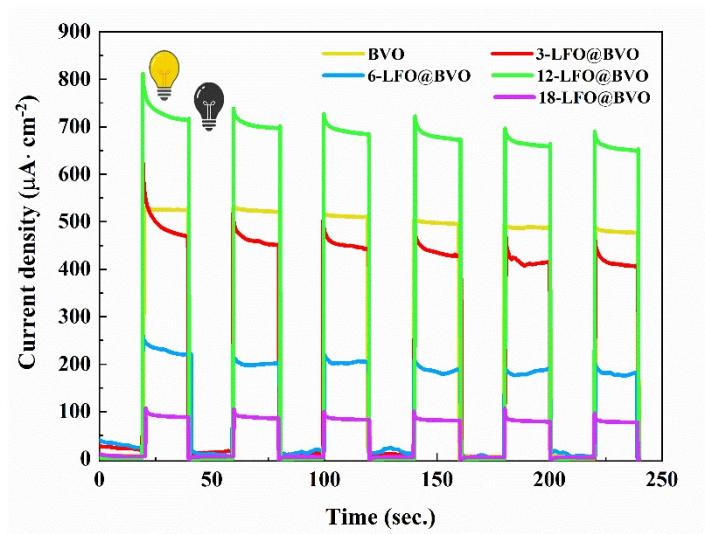

**Fig. S5** Chronoamperometry (i-t) plot of all samples under chopped light (20s dark/20s light), at 1 V vs Ag/AgCl (3M KCl) at scanning rate of 5 mV/s.

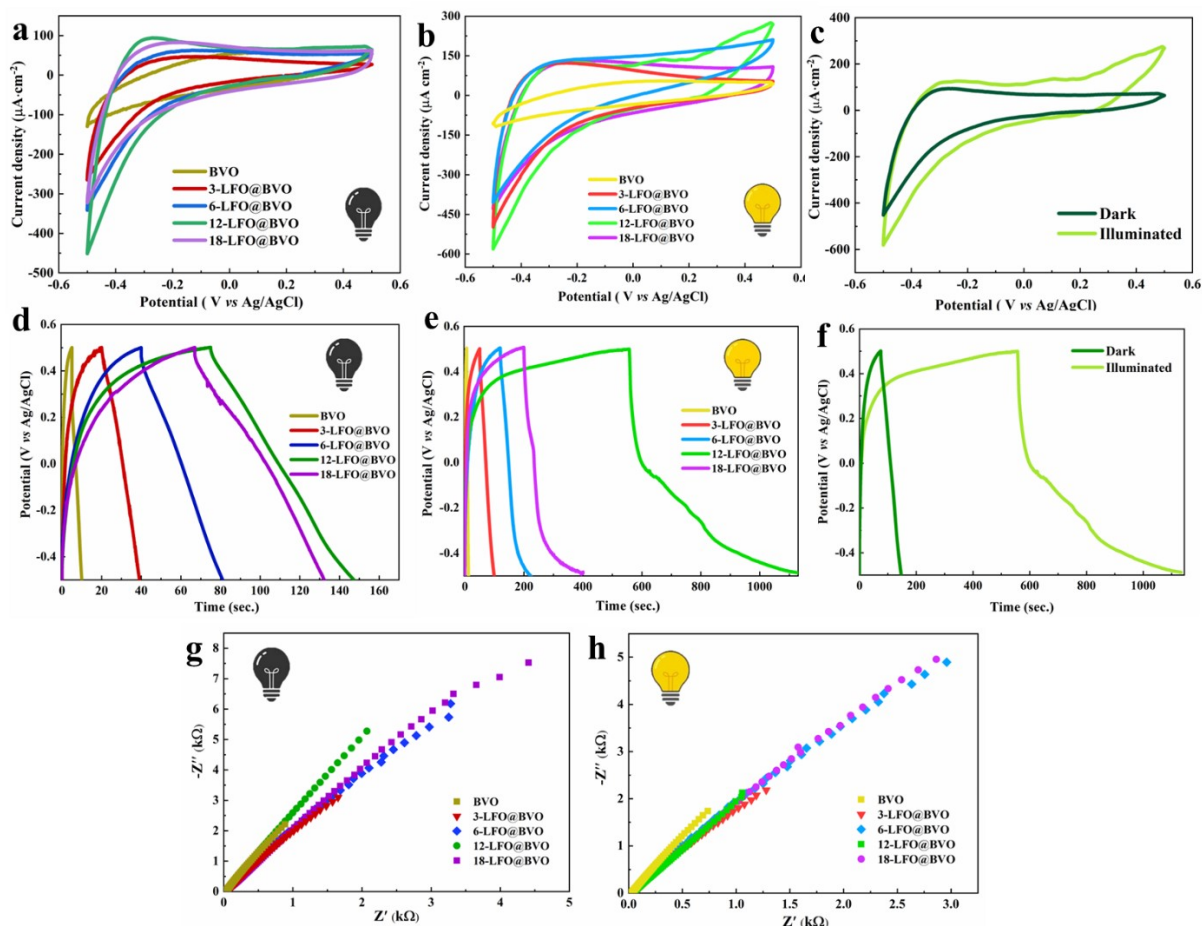

**Fig. S6** CV curves of all samples at 5 mV/s in the dark (a) and under illumination (b), CV curves of 12-LFO@BVO (c), GCD profiles of all samples at 0.2 mA cm<sup>-2</sup> in the dark (d) and under illumination (e), GCD curves of 12-LFO@BVO, Nyquist plots of all samples in the dark (g) and under illumination (h).



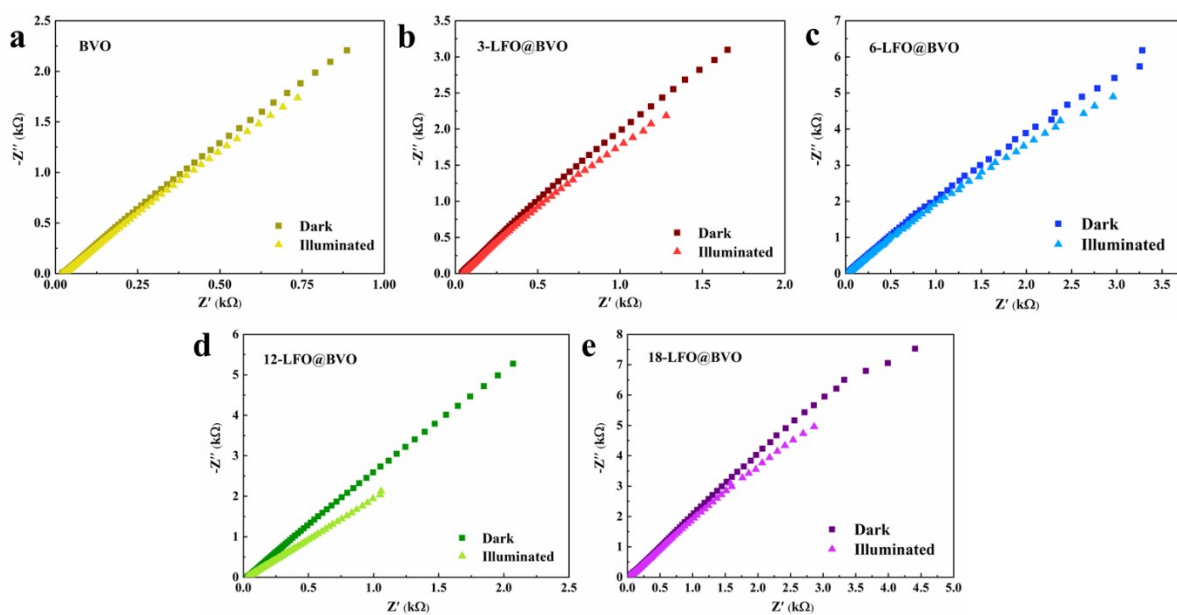

**Fig. S7** Nyquist plots of BVO (a), 3-LFO@BVO (b), 6-LFO@BVO (c), 12-LFO@BVO (d) and 18-LFO@BVO (e), in the dark and under illumination.

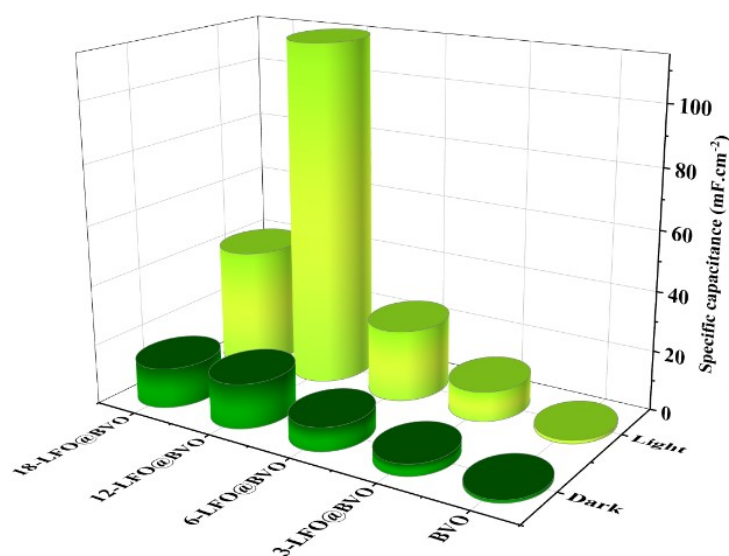

**Fig. S8** specific capacitance of all samples in both dark and light conditions. Sample 12-LFO@BVO showed 7.7-fold boost of capacitance upon illumination.

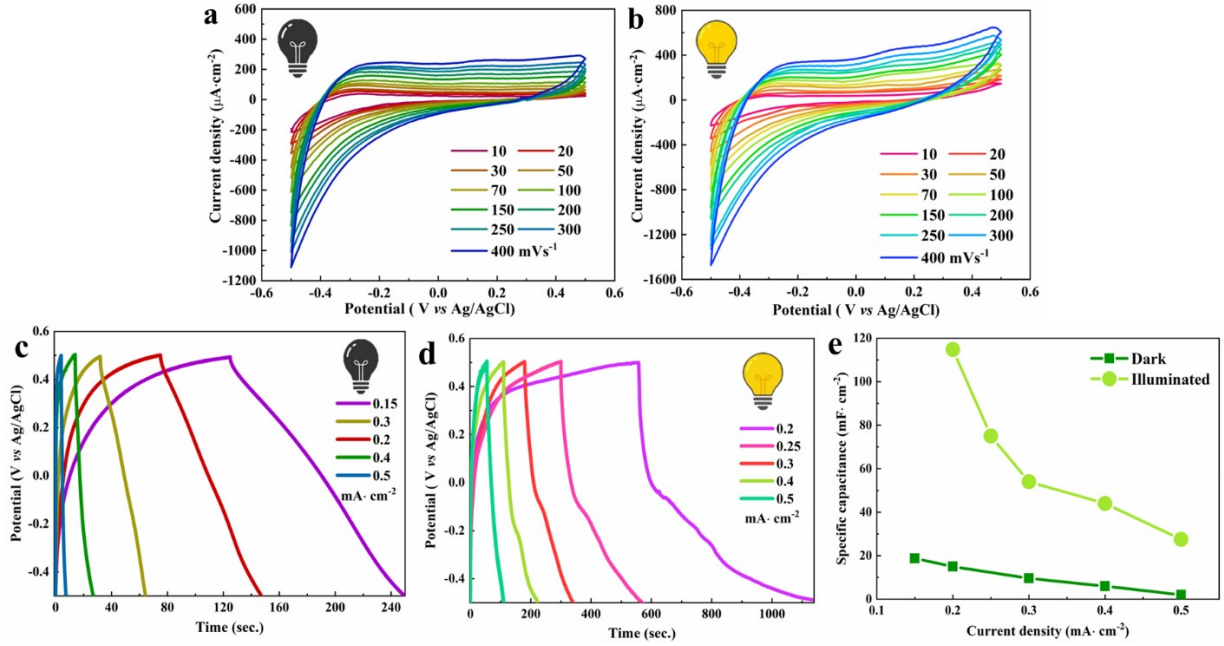

**Fig. S9** CV curves at varied scan rates in the dark (a) and under illumination (b), GCD curves at varied current densities in the dark (c) and under illumination (d), rate capability plot (C-i) (e) of 12-LFO@BVO.

**Table 1** Comparison of Photocapacitive Enhancement in BiVO<sub>4</sub>-Based Systems Reported in the Literature and This Work

| System / work                                                                                                      | Property compared                               | Approx. enhancement factor under light       |
|--------------------------------------------------------------------------------------------------------------------|-------------------------------------------------|----------------------------------------------|
| BiVO <sub>4</sub> -RGO bilayer photocapacitor (planar, Na <sub>2</sub> SO <sub>4</sub> ) <sup>1</sup>              | Specific capacitance at 0.2 A g <sup>-1</sup>   | Roughly 1.3–1.4× increase (~30–40% higher)   |
| BiVO <sub>4</sub> -V <sub>2</sub> O <sub>5</sub> @TiNT based photo-supercapacitor <sup>2</sup>                     | Areal capacitance at 0.1 mA cm <sup>-2</sup>    | Roughly ~2.7× higher capacitance             |
| Heterostructured BiVO <sub>4</sub> -PbO photocapacitor (“solar energy storage by BiVO <sub>4</sub> ”) <sup>3</sup> | Areal capacitance at ~0.015 mA cm <sup>-2</sup> | ~1.3× increase (~30% higher)                 |
| rGH/BiVO <sub>4</sub> aqueous Zn-ion photorechargeable capacitor <sup>4</sup>                                      | Specific capacitance at 0.1 A g <sup>-1</sup>   | 1.26× increase (26.3% higher)                |
| Mo:Co coated BiVO <sub>4</sub> photoelectrodes for photosupercapacitors <sup>5</sup>                               | Areal capacitance at 0.02 mA cm <sup>-2</sup>   | 50–275 % improvement                         |
| General BiVO <sub>4</sub> -based photochargeable integrated devices (reviewed) <sup>6</sup>                        | Capacitance or stored charge                    | Typically, 20–100% higher under illumination |
| This work                                                                                                          | Areal capacitance at 0.2 mA cm <sup>-2</sup>    | ~ 7.7× improvement                           |

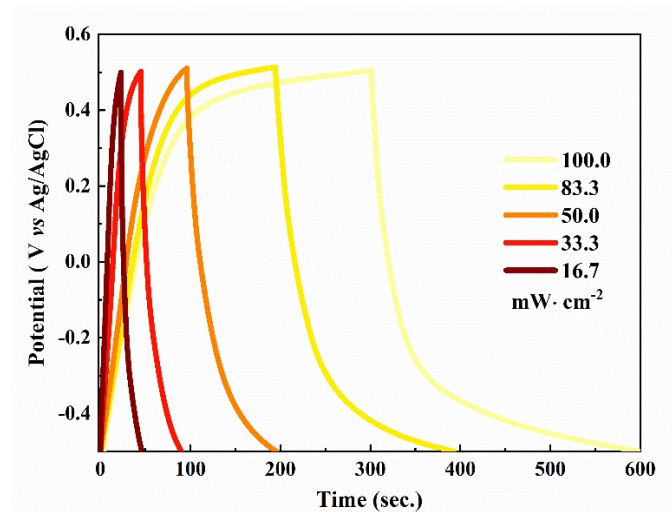

**Fig. S10** GCDs of 12-LFO@BVO at  $0.5 \text{ mA cm}^{-2}$  at under illumination at different light intensities. It shows longer charge/discharge durations as light intensity increases, demonstrating higher stored charge and enhanced capacitance under stronger illumination due to increased photocarrier generation.

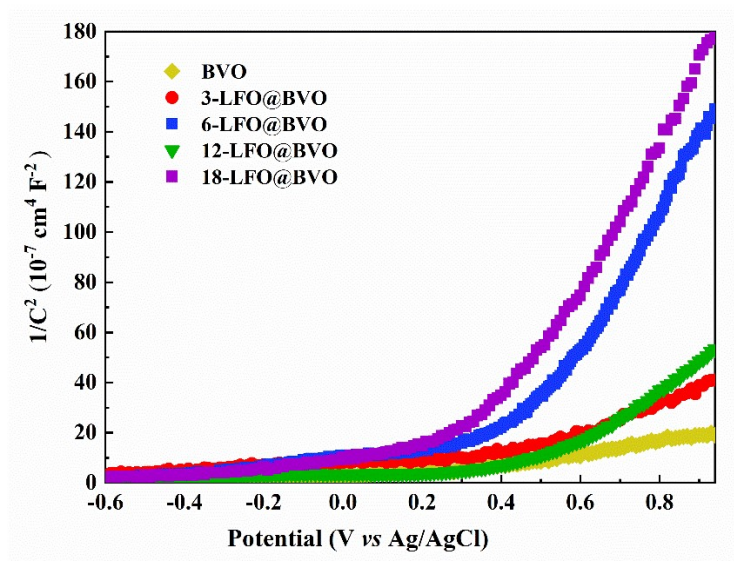

**Fig. S11** Mott-Schottky plots of all prepared photoelectrodes

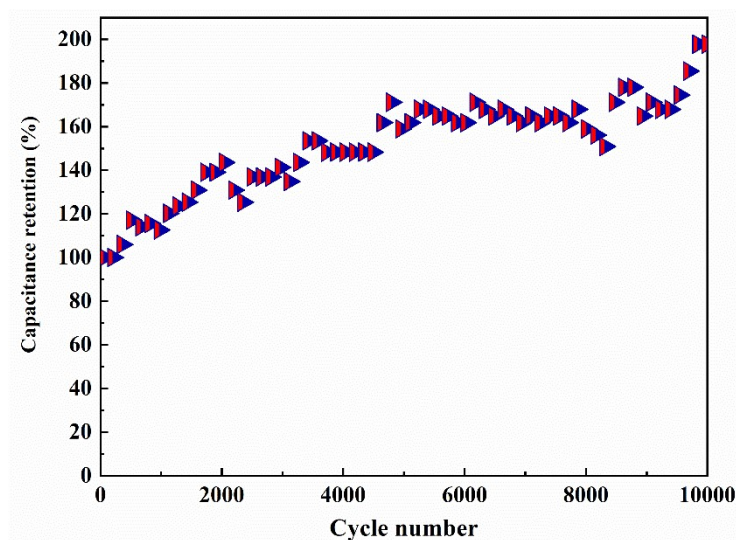

**Fig. S12** Cycling stability of 12-LFO@BVO after 10,000 cycles at 0.2 mA cm<sup>-2</sup>

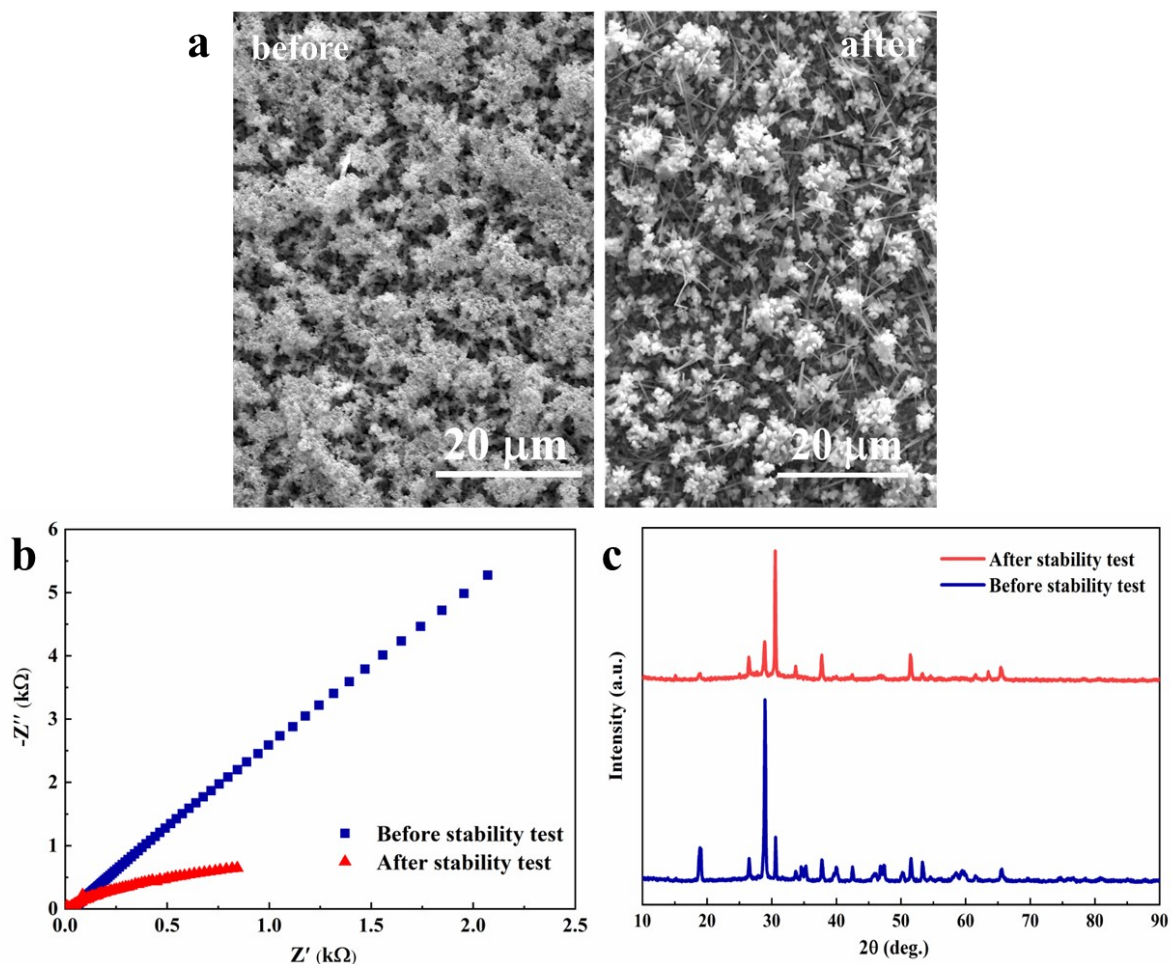

**Fig. S13** Evidence of cycling-induced self-activation. (a) SEM images showing the transition from a dense agglomerated overlayer in the pristine sample to an exposed, porous nanoneedle network after 10,000 cycles. (b) Nyquist plots illustrating significant reductions in charge-transfer resistance and diffusion impedance, consistent with the increased active surface area. (c) XRD patterns confirming structural stability with a preferential reorientation toward the active (040) facet.



### 3. Photo-supercapacitors

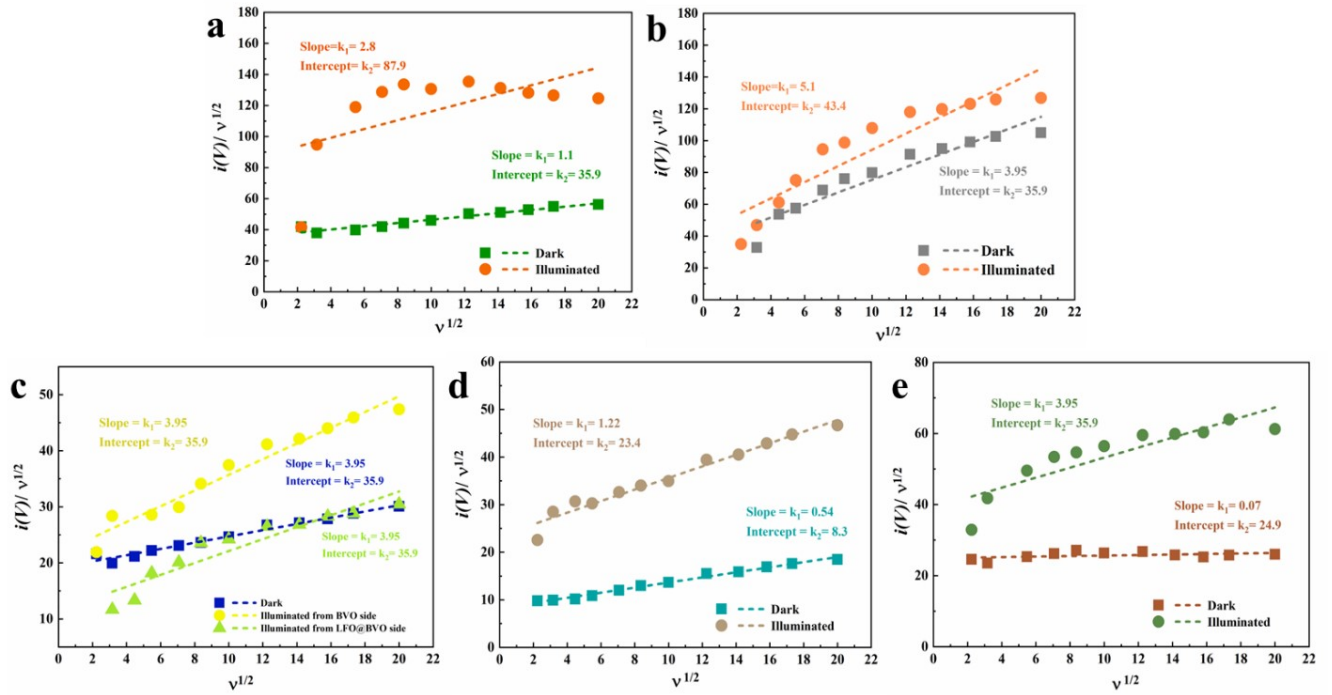

**Fig. S14** Plots of  $i(V)/v^{1/2}$  versus  $v^{1/2}$  for symmetric LFO@BVO (a), graphite//LFO@BVO (b), BVO//LFO@BVO (c), LFO//LFO@BVO (d), and LFO//BVO (e) PSCs.

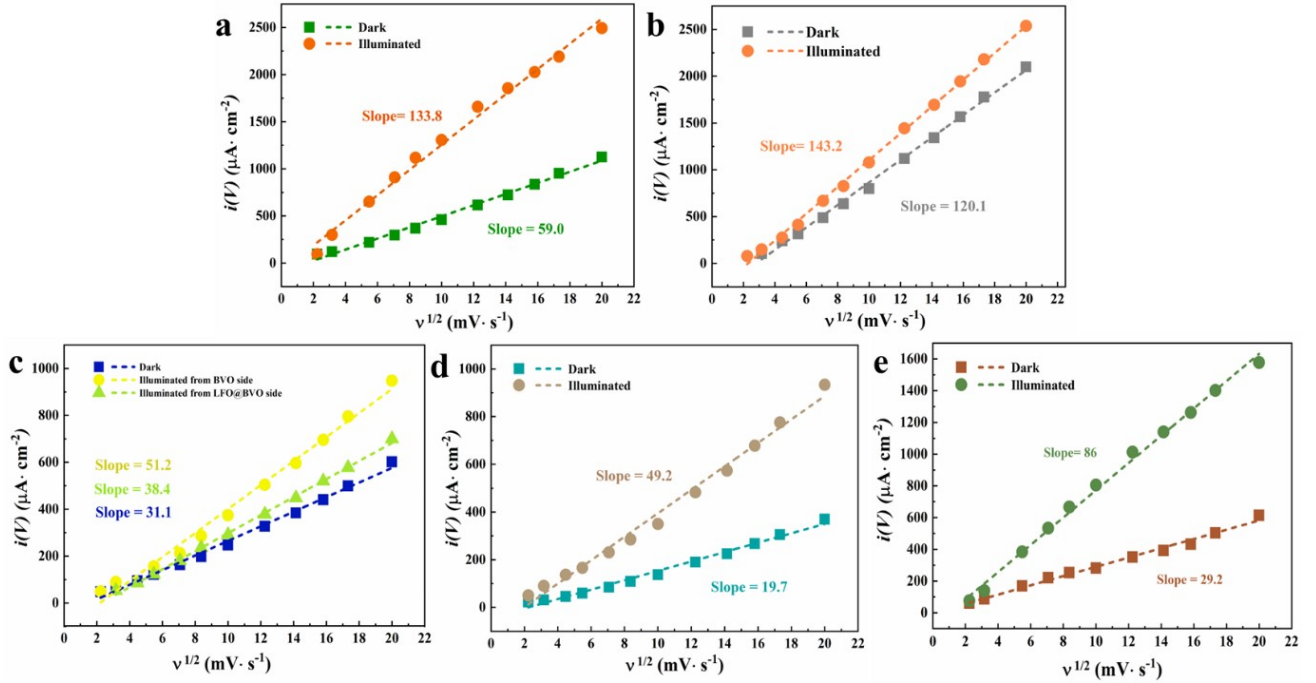

**Fig. S15** Comparison of diffusion coefficients in the dark and under illumination for symmetric LFO@BVO (a), graphite//LFO@BVO (b), BVO//LFO@BVO (c), LFO//LFO@BVO (d), and LFO//BVO (e) photo-supercapacitors.

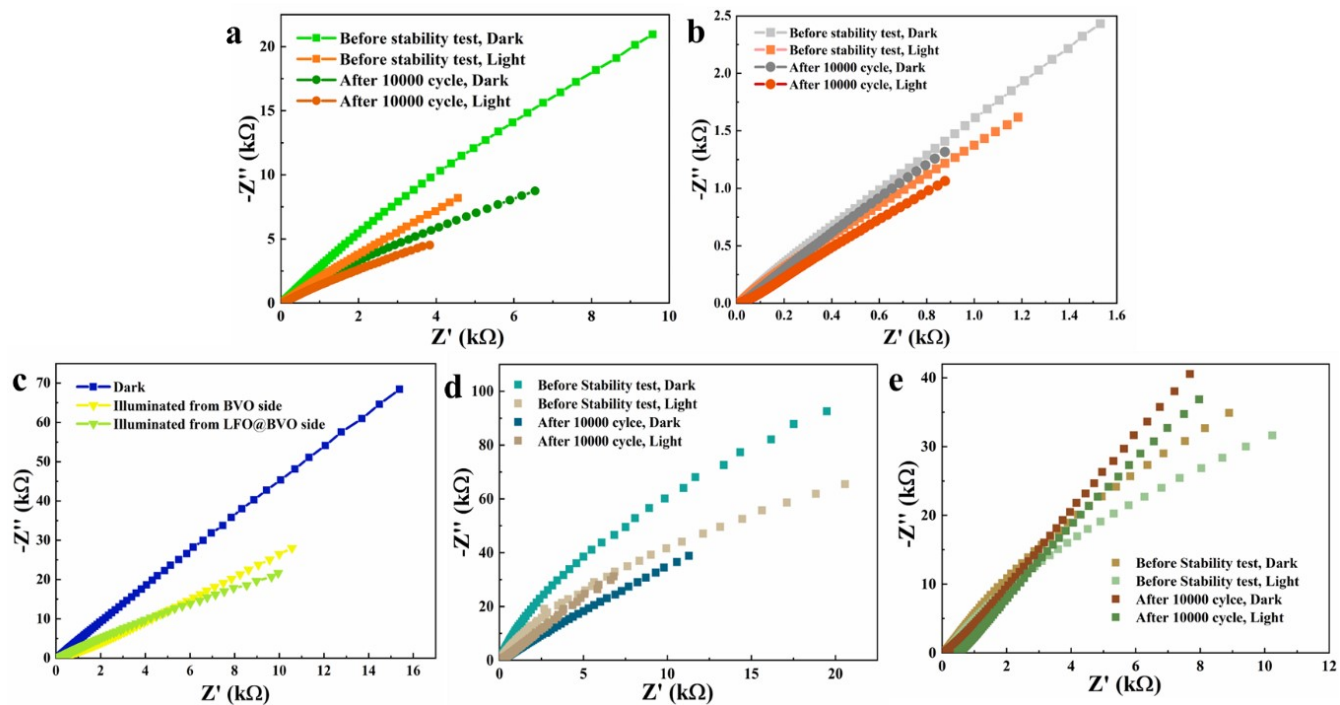

**Fig. S16** Nyquist plots of symmetric LFO@BVO (a), Graphite//LFO@BVO (b), BVO//LFO@BVO (c), LFO//LFO@BVO (d) and LFO//BVO (e) PSCs measured at different conditions.

## Experimental section

### *Preparation of BVO photoelectrode*

Co-electrodeposition of  $\text{BiVO}_4$  and  $\text{V}_2\text{O}_5$  was conducted with a slight modification from previous reports in literature. In short, 10 mM  $\text{Bi}(\text{NO}_3)_3 \cdot 5\text{H}_2\text{O}$  (98%, EXIR) was dissolved in a solution containing 35 mM  $\text{VOSO}_4$  (97%, Sigma-Aldrich). Then 2 M sodium acetate anhydrous ( $\geq 99.0\%$ , Titrachem) was added and the pH of the solution was adjusted to 3.7 by  $\text{HNO}_3$  ( $\geq 69\%$ , Honeywell). A three-electrode system was used, implementing platinum foil, Ag/AgCl (3M KCl) and FTO glass as counter, reference and working electrode respectively. Deposition of Bi-V-O film was carried out at constant potential of 1.9 V vs. Ag/AgCl for 30 minutes, at raised temperature of 70 °C. The as-prepared sample was rinsed and annealed at 500 °C for 1h (with a ramping rate of 2 °C/min) to obtain crystalline  $\text{BiVO}_4$ - $\text{V}_2\text{O}_5$  film.

### *Preparation of LFO@BVO photoelectrodes*

Lanthanum ferrite perovskite ( $\text{LaFeO}_3$ , LFO) was electrodeposited on  $\text{BiVO}_4$ - $\text{V}_2\text{O}_5$  (BVO) film via a facile electrodeposition using the three-electrode system mentioned above in an electrolyte containing 21 mM  $\text{La}(\text{NO}_3)_3 \cdot 6\text{H}_2\text{O}$  (99.999%, Sigma-Aldrich), 18 mM  $\text{FeCl}_2 \cdot 4\text{H}_2\text{O}$

(99.0%, Merck), and 400 mM  $\text{KNO}_3$  (99.0%, Merck). The electrodeposition was executed potentiostatically at -1.09 V, at ambient temperature for variant durations of 30, 60, 120 and 180 seconds. Freshly synthesized samples were rinsed and annealed at 400 °C for 2h (with a ramping rate of 2 °C/min). These samples were denoted as 3-LFO@BVO, 6-LFO@BVO, 12-LFO@BVO and 18-LFO@BVO, respectively.

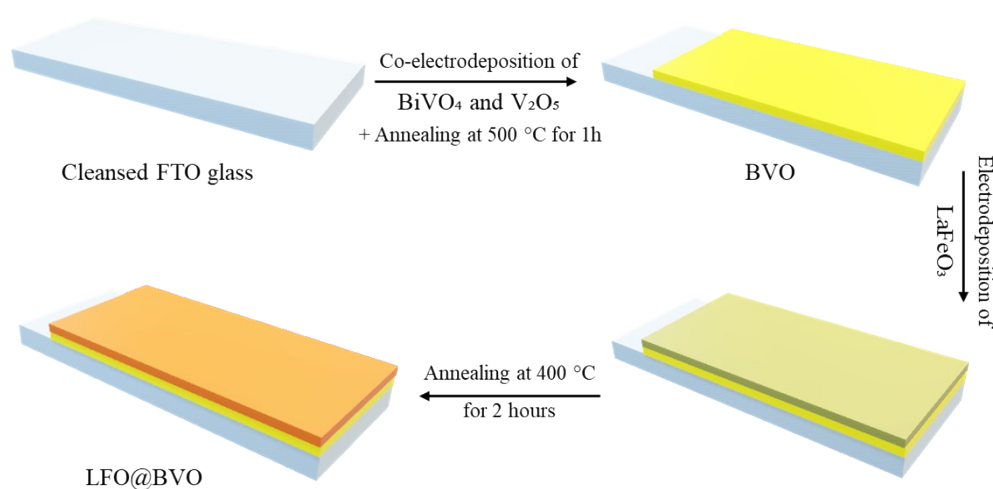

**Fig. S17** Schematic illustrating the preparation of the LFO@BVO electrodes

## References:

- 1 A. Roy, P. Majumdar, P. Sengupta, S. Kundu, S. Shinde, A. Jha, K. Pramanik, H. Saha, *Electrochimica Acta* **2020**, 329, 135170.
- 2 A. S. Renani, M. M. Momeni, H. M. Aydisheh, B.-K. Lee, *Journal of Energy Storage* **2023**, 62, 106866.
- 3 S. Safshekan, I. Herraiz-Cardona, D. Cardenas-Morcoso, R. Ojani, M. Haro, S. Gimenez, *ACS Energy Letters* 2017, 2, 469-475.
- 4 C.-b. Zheng, Z.-c. Du, J.-k. Li, H.-d. Jiang, X. Liu, P.-c. Guo, H. Zhu, Y.-x. Wang, *Journal of Energy Storage* **2024**, 92, 112204.
- 5 A. S. Renani, Z. Hosseini, D. Eberhart, A. W. Maijenburg, M. M. Momeni, *Journal of Power Sources* 2025, 640, 236687.
- 6 C. Tuc Altaf, A. M. Rostas, A. Popa, D. Toloman, M. Stefan, N. Demirci Sankir, M. Sankir, *ACS Omega* 2023, 8, 47393-47411.
